# Supplementary figures and images for: A Specific Primed Immune Response in Drosophila Is Dependent on Phagocytes
Source: PLOS journal article supplement (doi:10.1371/journal.ppat.0030026), 2007-03-06

Supplemental Figure 5 Pham et al.

A

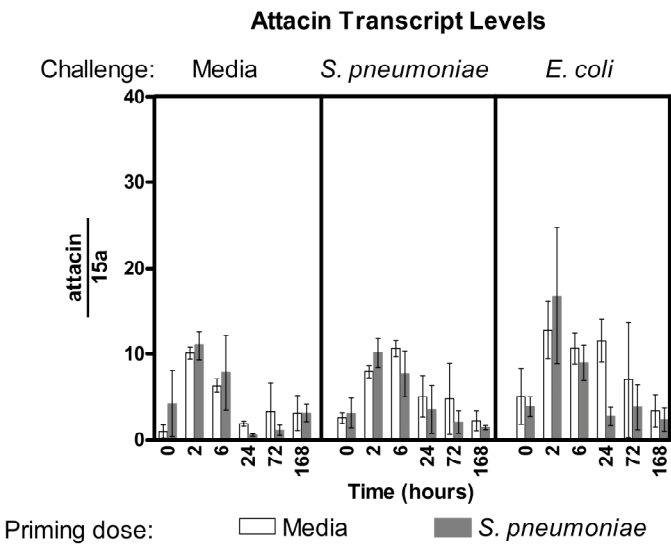

B

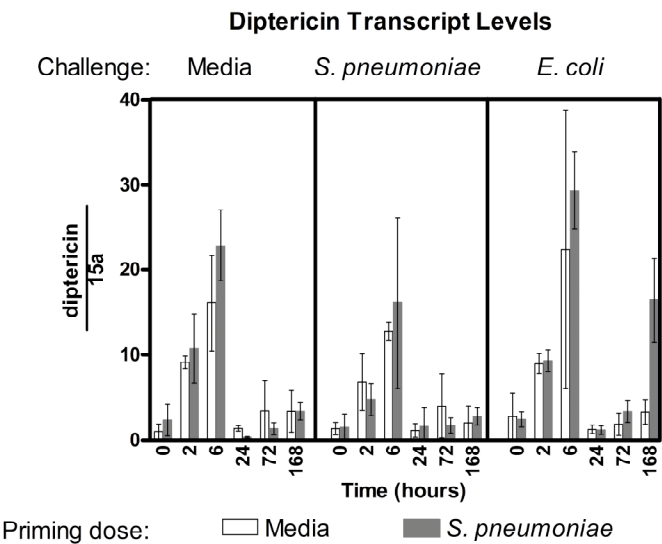

Supplement: S5 (10.1371/journal.ppat.0030026.s005) [file journal.ppat.0030026.s005]
